# Supplementary material for: Renal amyloid‐A amyloidosis in cats: Characterization of proteinuria and biomarker discovery, and associations with kidney histology
Source: PubMed Central journal article supplement (PMC10800178; doi:10.1111/jvim.16920), 2023-11-22

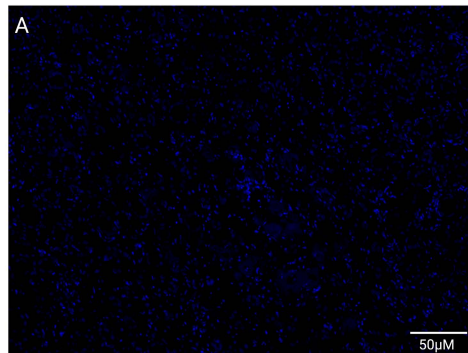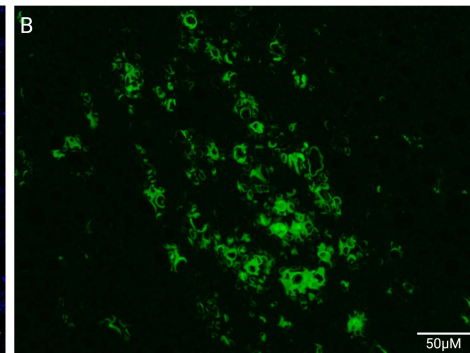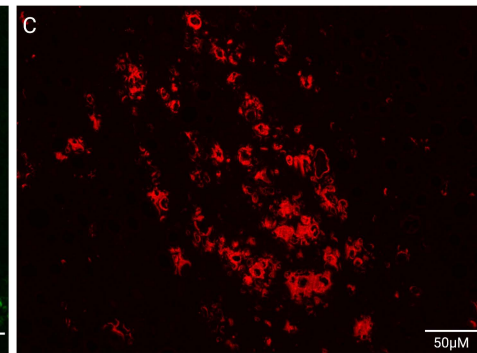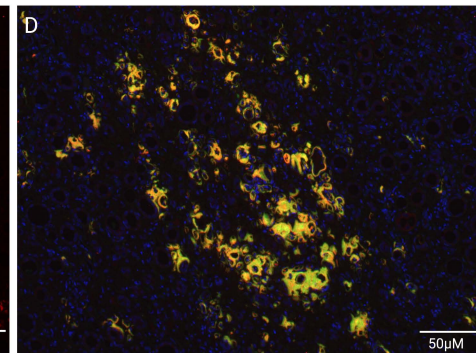

Supplement: JVIM-38-205-s001.pdf [file JVIM-38-205-s001.pdf]
